# Supplementary material for: Poly(dopamine)-inspired surface functionalization of polypropylene tissue mesh for prevention of intra-peritoneal adhesion formation
Source: Royal Society of Chemistry journal article supplement (doi:10.1039/c6tb02667b), 2016-12-13
Supplement: c6tb02667b1.pdf [file c6tb02667b1.pdf]

## Supporting Information for

### **Poly(dopamine)-inspired surface functionalization of polypropylene tissue mesh for prevention of intra-peritoneal adhesion formation**

Wanjun Hu<sup>a</sup>, Shenglin Lu<sup>b</sup>, Ying Ma<sup>c</sup>, Xiaoe Ma<sup>a</sup>, Pengfei Ren<sup>a</sup>, Naizhen Zhou<sup>a</sup>,

Tianzhu Zhang<sup>a,\*</sup>, Zhengling Ji<sup>b</sup>

<sup>a</sup> State Key Lab of Bioelectronics, Jiangsu Key Lab for Biomaterials and Devices, School of Biological Science and Medical Engineering, Southeast University, Nanjing, 210096, China.

<sup>b</sup> Department of General Surgery, Zhongda Hospital, School of Medicine, Southeast University, Nanjing, 210009, China.

<sup>c</sup> West China Hospital of Sichuan University, Chengdu, 610041, China.

\* Corresponding author. State Key Lab of Bioelectronics, Jiangsu Key Lab for Biomaterials and Devices, School of Biological Science and Medical Engineering, Southeast University, Nanjing, 210096, China.

\* E-mail address: zhangtianzhu@seu.edu.cn

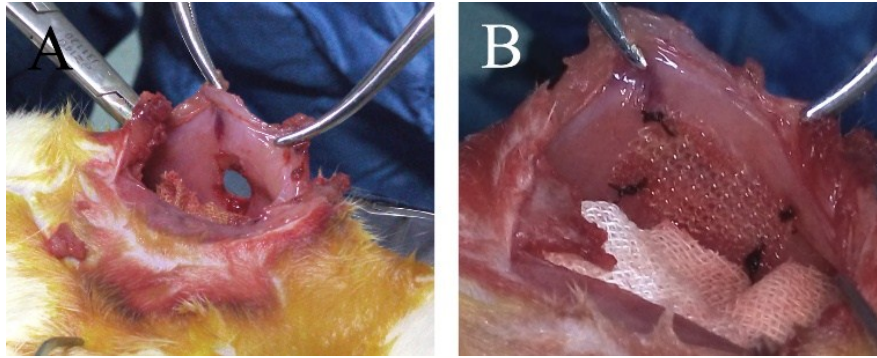

**Figure S1.** Abdominal wall defect and repaired with the O-PP/PDA/CS mesh. (A) Abdominal wall defect (1.0 cm × 1.0 cm) were created. (B) The wall defect was repaired with the O-PP/PDA/CS mesh.

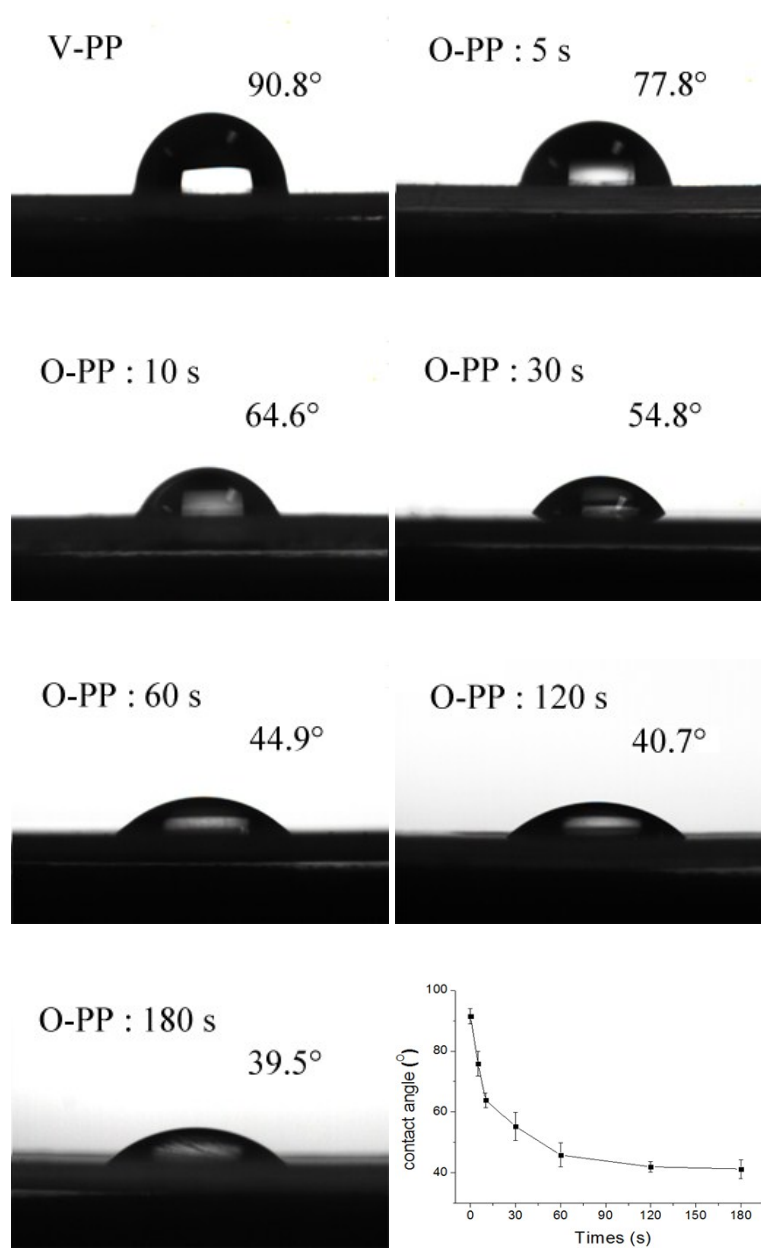

**Figure S2.** The surface plasma treatment time increased from 0 s to 180 s, the water contact angle decreased with treatment time increasing (Data were mean  $\pm$  SD, n = 3).

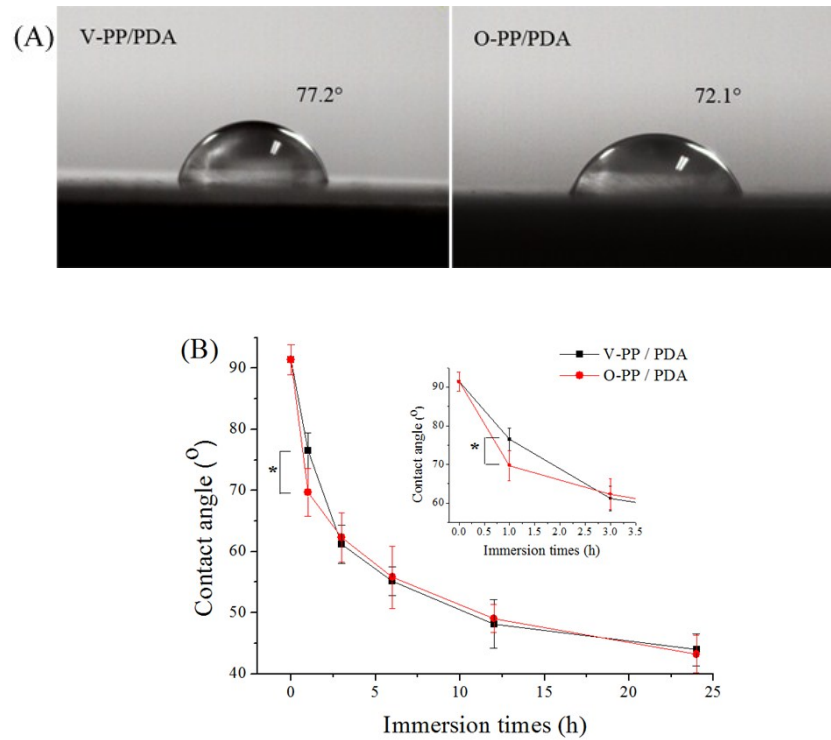

**Figure S3.** The initial CA of original PP mesh as well as modified PP mesh and its change. (A) Effect of immersion time in dopamine solution on contact angle change of V-PP and O-PP meshes after been immersed for 1 hour in dopamine solution. (B) Comparison of static contact angle of V-PP and O-PP meshes after been immersed for 24 hours in dopamine solution. (Data were mean  $\pm$  SD (n = 3) and “\*” represent  $P < 0.05$ )

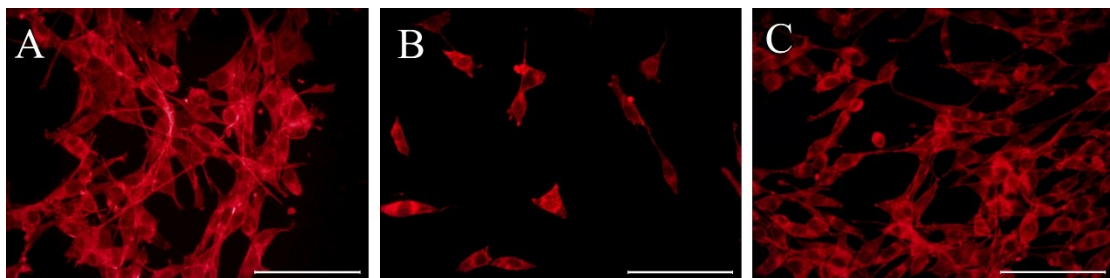

**Figure S4.** The NIH-3T3 cytoskeleton morphology on different substrates. (A). The fibroblasts were seeded into 24-well plate (control) (B).The fibroblasts were seeded onto V-PP substrates,

there were still many cells attached and spread onto the substrate. (C). Poly (dopamine) ad-layer significantly promoted cell adhesion and proliferation on substrates. All samples were incubated for 48 hours and scale bars represent 100  $\mu\text{m}$ .

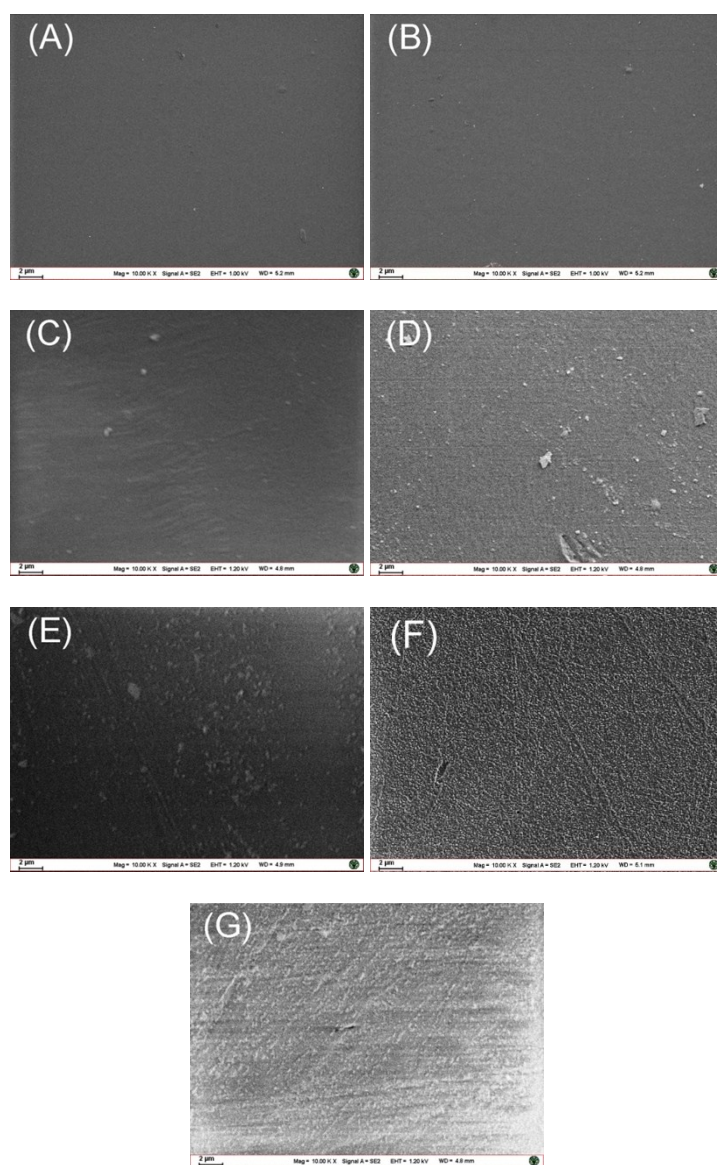

**Figure S5.** The SEM revealed the surface morphology of oxygen plasma treated PP with increasing plasma treatment time (PDC-M, intensity 200 w, oxygen flow = 300 mL/min). (A) V-PP; (B) 5 s; (C) 10 s; (D) 30 s; (E) 60 s; (F) 120 s; (G) 180 s
